# Supplementary material
Source: PubMed Central journal article supplement (PMC4733392)
Supplement: NIHMS725728-supplement-supplement_1.pdf [file NIHMS725728-supplement-supplement_1.pdf]

1 **Supplementary Figure 1: Subgroup analysis - By type of intervention (Clinical management [1a]; Biomedical prevention [1b];**  
 2 **Behavioral prevention [1c]; and Health services [1d]). Node size is proportional to node betweenness centrality. Outcomes are**  
 3 **labeled using their outcome codes.**

4 **Supplementary Figure 1a – Sub-network of outcomes in reviews assessing clinical management interventions**  
 5

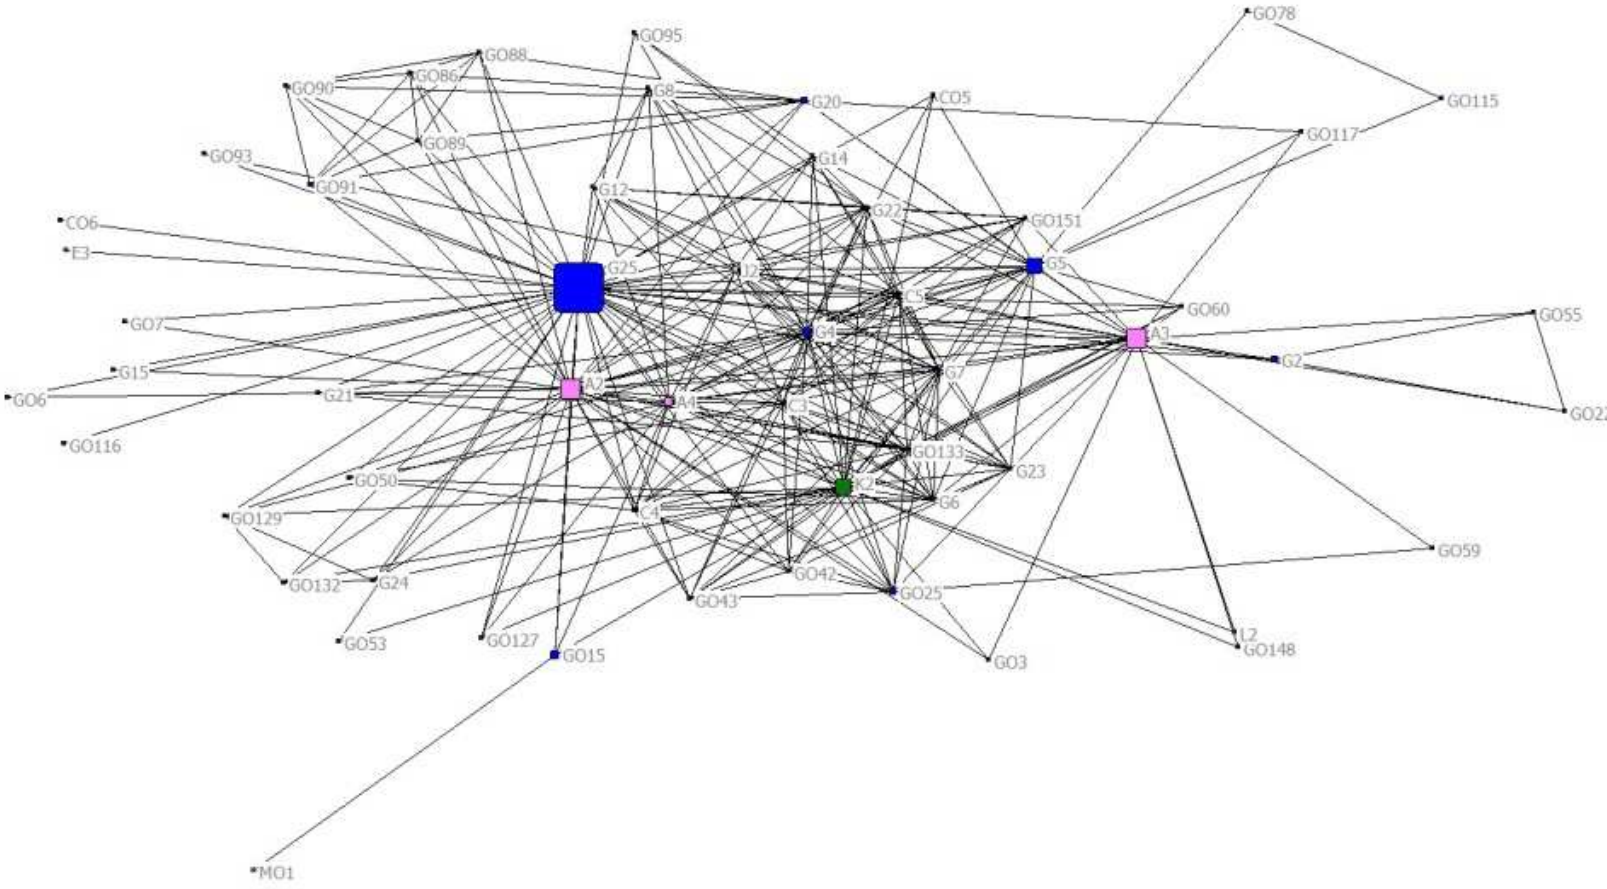

6  
 7 Alphanumeric codes are provided next to each node to depict categories of each outcome and facilitate comparisons with Table 2, Figure 1,  
 8 and Appendix 1. Each alphabet denotes a separate outcome category.

9

1 **Supplementary Figure 1b – Sub-network of outcomes in reviews assessing biomedical prevention interventions**

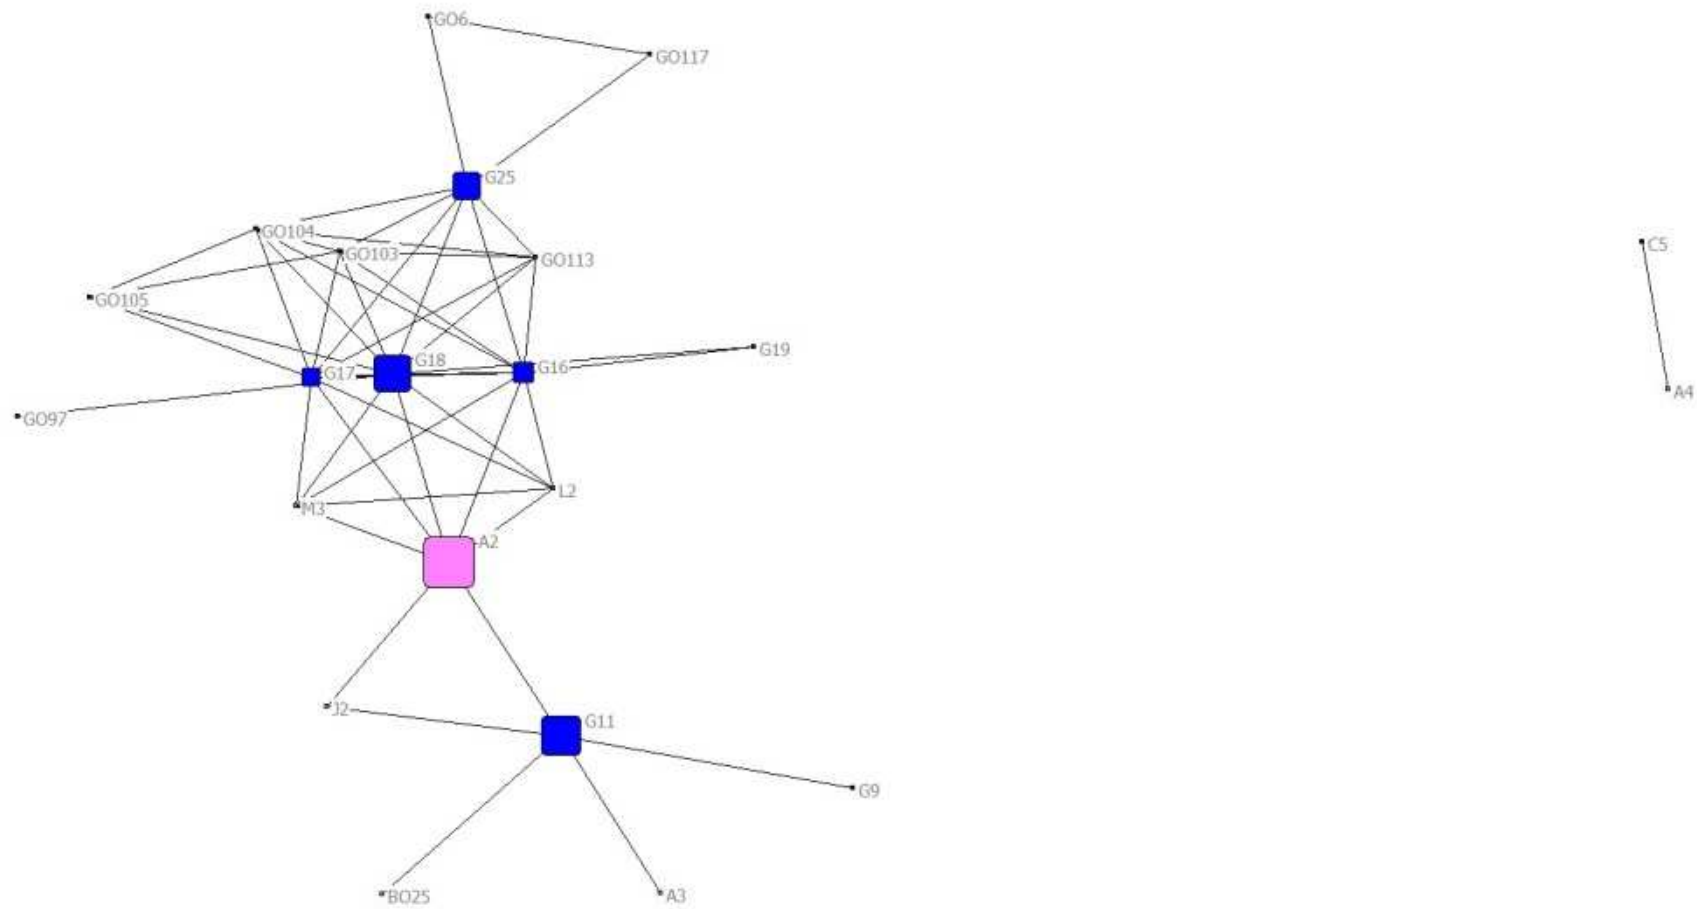

2

3

4 Alphanumeric codes are provided next to each node to depict categories of each outcome and facilitate comparisons with Table 2, Figure 1,  
5 and Appendix 1. Each alphabet denotes a separate outcome category.

6

1 **Supplementary Figure 1c – Sub-network of outcomes in reviews assessing behavioral prevention interventions**

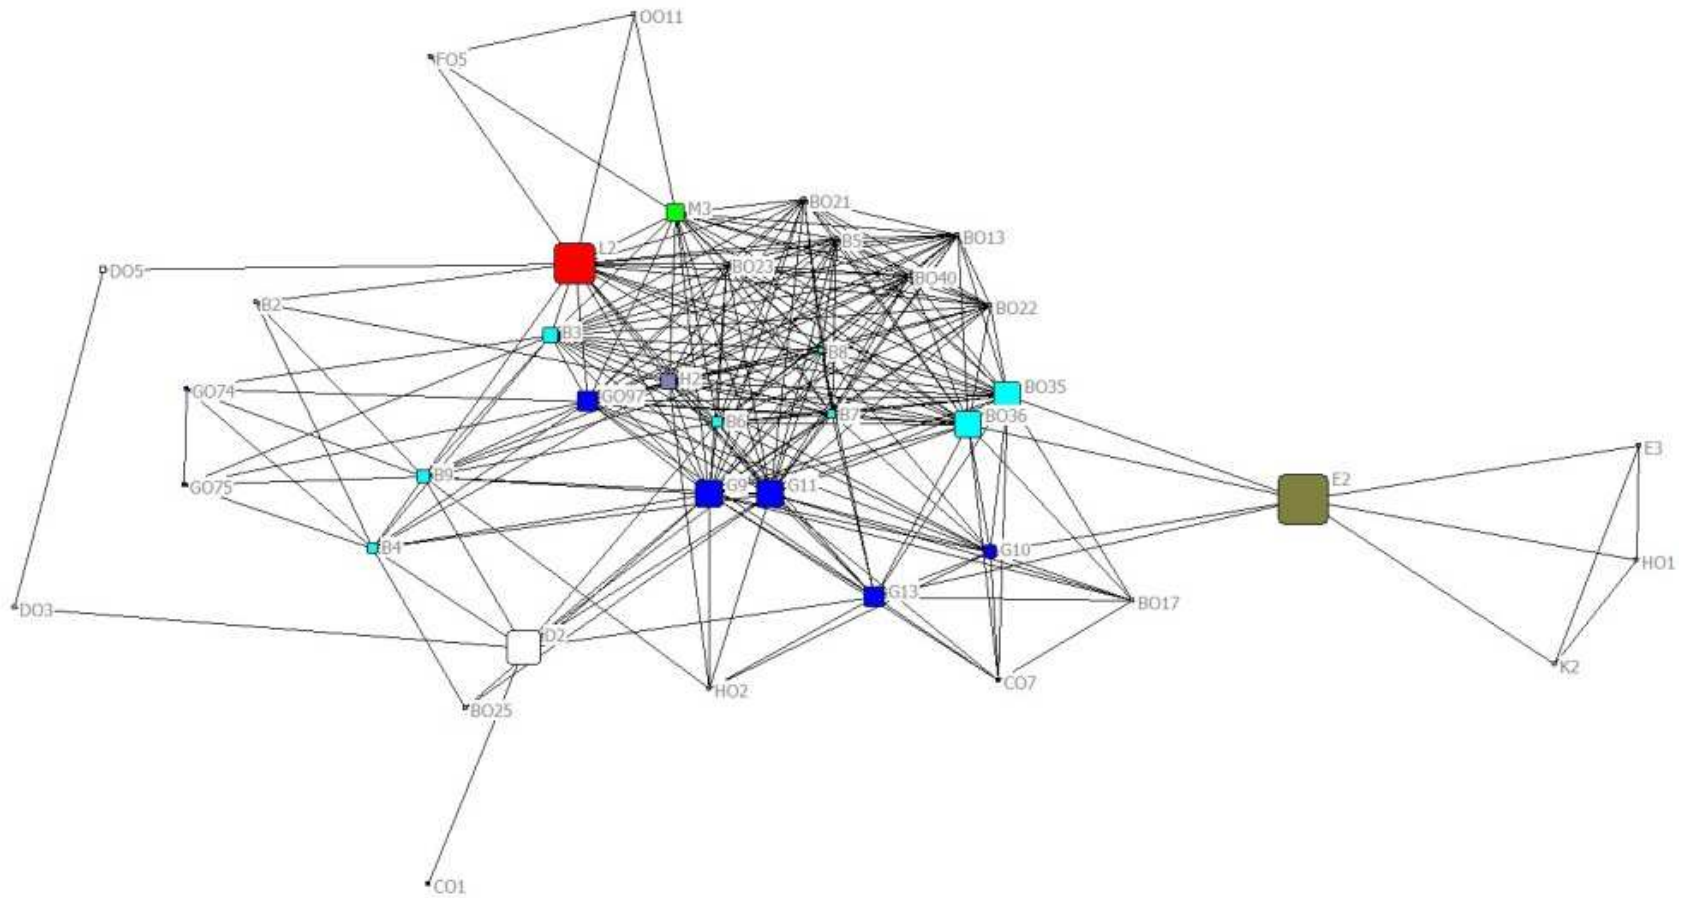

2

3

4 Alphanumeric codes are provided next to each node to depict categories of each outcome and facilitate comparisons with Table 2, Figure 1,  
5 and Appendix 1. Each alphabet denotes a separate outcome category.

6

7

1 **Supplementary Figure 1d – Sub-network of outcomes in reviews assessing health services interventions**

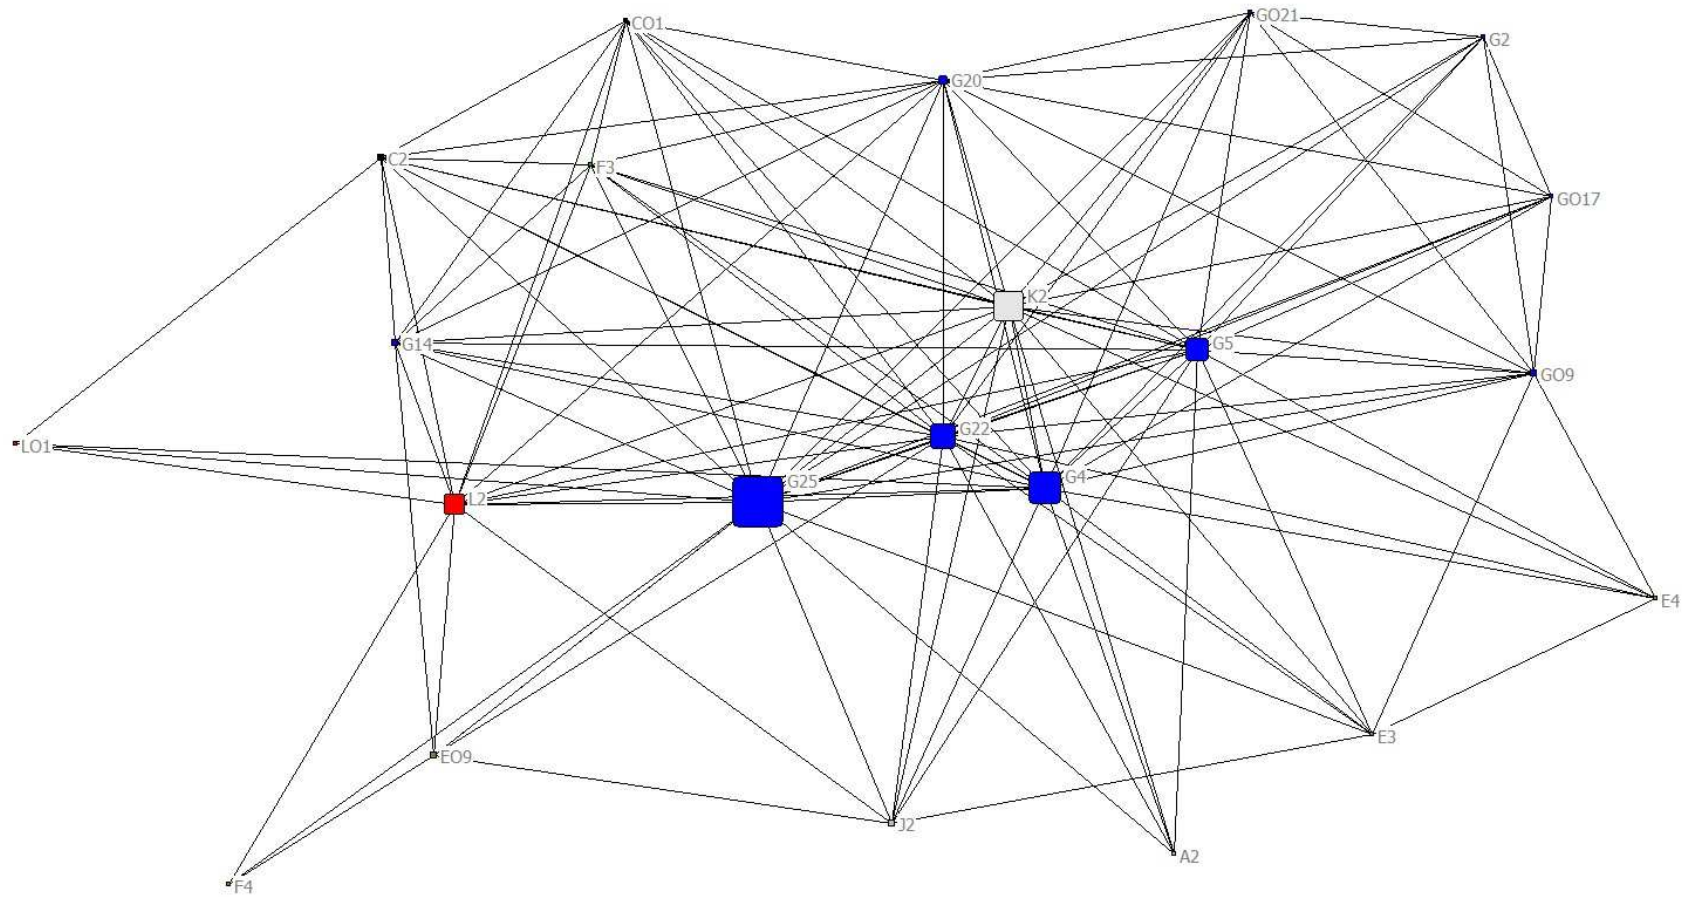

2

3 Alphanumeric codes are provided next to each node to depict categories of each outcome and facilitate comparisons with Table 2, Figure 1,  
4 and Appendix 1. Each alphabet denotes a separate outcome category.

5

6

| Category (number of contained outcomes)      | Sub-category (number of contained outcomes) | Outcomes                                                                                                                                                                                                                                                                                                                                                                                                                                                                                                                                                                                                                                                                                                                                                                                                                                                                                                                                                                                                                                                                                                                                                                                                                                                                                                                                                                                                                                                                                                                                                                                                                                                                                                                                                                                                                                                                                                        | Alphanumeric outcome code                                                                                                                                                                                                                                                                                               | Number of systematic reviews named in                                                                                                                                                                       |
|----------------------------------------------|---------------------------------------------|-----------------------------------------------------------------------------------------------------------------------------------------------------------------------------------------------------------------------------------------------------------------------------------------------------------------------------------------------------------------------------------------------------------------------------------------------------------------------------------------------------------------------------------------------------------------------------------------------------------------------------------------------------------------------------------------------------------------------------------------------------------------------------------------------------------------------------------------------------------------------------------------------------------------------------------------------------------------------------------------------------------------------------------------------------------------------------------------------------------------------------------------------------------------------------------------------------------------------------------------------------------------------------------------------------------------------------------------------------------------------------------------------------------------------------------------------------------------------------------------------------------------------------------------------------------------------------------------------------------------------------------------------------------------------------------------------------------------------------------------------------------------------------------------------------------------------------------------------------------------------------------------------------------------|-------------------------------------------------------------------------------------------------------------------------------------------------------------------------------------------------------------------------------------------------------------------------------------------------------------------------|-------------------------------------------------------------------------------------------------------------------------------------------------------------------------------------------------------------|
| Behavioral (n=51)                            | Drug/Substance use-related (n=7)            | <i>Drug/substance use behavior</i><br><i>Alcohol risk behavior</i><br><i>Tobacco risk behavior</i><br><i>Marijuana risk behavior</i><br><i>Injection drug/substance use behavior</i><br><i>Needle sharing</i><br><i>Needle changes</i>                                                                                                                                                                                                                                                                                                                                                                                                                                                                                                                                                                                                                                                                                                                                                                                                                                                                                                                                                                                                                                                                                                                                                                                                                                                                                                                                                                                                                                                                                                                                                                                                                                                                          | B2<br>B01<br>B02<br>B03<br>B04<br>B05<br>B06                                                                                                                                                                                                                                                                            | 3<br>2<br>1<br>1<br>3<br>2<br>1                                                                                                                                                                             |
|                                              | Sexual risk behavior-related (n=40)         | <i>Sexual risk behavior</i><br><i>Sexual risk behavior - intention</i><br><i>Abstinence</i><br><i>Abstinence - intention</i><br><i>Abstinence - duration</i><br><i>Mutual monogamy</i><br><i>Incidence of sexual debut</i><br><i>Intergenerational sex</i><br><i>Exchange of sex for favors (food, money, lodging, etc.)</i><br><i>Alcohol use/intoxication before/with sex</i><br><i>Type of sexual practice (vaginal, anal (receptive/insertive), oral)</i><br><i>Unprotected sex (type unspecified)</i><br><i>Unprotected vaginal sex</i><br><i>Unprotected anal sex</i><br><i>Unprotected oral sex</i><br><i>Frequency of sexual encounters (unspecified)</i><br><i>Frequency of sexual encounters - consensual</i><br><i>Frequency of sexual encounters - nonconsensual</i><br><i>Frequency of sexual encounters - vaginal sex</i><br><i>Frequency of sexual encounters - anal sex</i><br><i>Frequency of sexual encounters - oral sex</i><br><i>Frequency of sexual encounters - unprotected sex</i><br>Partners-related (sub-category only)<br><i>Partner change</i><br><i>Number of sexual partners</i><br><i>Multiple sexual partners</i><br><i>Sex with seroconcordant partners</i><br><i>Sex with non-marital partners</i><br><i>Sex with casual partners</i><br><i>Sex with commercial sex workers (unspecified)</i><br><i>Unprotected sex with commercial sex workers</i><br><i>Type of partner (same gender/different gender)</i><br><i>Contraception/family planning use/decisions</i><br><i>Improved communication with partners about safer sex practices</i><br>Condoms-related (sub-category only)<br><i>Condom acquisition</i><br><i>Condom use (unspecified)</i><br><i>Condom use - male condoms</i><br><i>Condom use - female condoms</i><br><i>Condom use - intention to use</i><br><i>Condom use - negotiation skills</i><br><i>Condom use - refusal of intercourse with no condoms</i> | B07<br>B08<br>B3<br>B09<br>B010<br>B011<br>B013<br>B014<br>B015<br>B016<br>B017<br>B4<br>B5<br>B6<br>B7<br>B018<br>B019<br>B020<br>B021<br>B022<br>B023<br>B045<br>NA<br>B024<br>B8<br>B025<br>B026<br>B027<br>B028<br>B029<br>B030<br>B031<br>B032<br>B033<br>NA<br>B034<br>B9<br>B035<br>B036<br>B038<br>B039<br>B040 | 1<br>1<br>5<br>2<br>2<br>1<br>3<br>1<br>3<br>3<br>3<br>8<br>5<br>7<br>6<br>2<br>1<br>1<br>4<br>4<br>4<br>4<br>1<br>NA<br>1<br>8<br>5<br>1<br>1<br>3<br>1<br>3<br>1<br>NA<br>1<br>7<br>8<br>8<br>1<br>1<br>3 |
|                                              | Other behavioral outcome domains (n=4)      | <i>Bed net use</i><br><i>Increased criminal behaviors</i><br><i>Breastfeeding behaviors</i><br><i>Provider risk behaviors</i>                                                                                                                                                                                                                                                                                                                                                                                                                                                                                                                                                                                                                                                                                                                                                                                                                                                                                                                                                                                                                                                                                                                                                                                                                                                                                                                                                                                                                                                                                                                                                                                                                                                                                                                                                                                   | B041<br>B042<br>B043<br>B044                                                                                                                                                                                                                                                                                            | 1<br>1<br>2<br>1                                                                                                                                                                                            |
| Anti-retroviral prophylaxis/treatment (n=10) | Antiretroviral prophylaxis-related (n=2)    | <i>Antiretroviral prophylaxis (unspecified)</i><br><br><i>Pre-exposure prophylaxis (PreP) or prophylaxis use/uptake</i>                                                                                                                                                                                                                                                                                                                                                                                                                                                                                                                                                                                                                                                                                                                                                                                                                                                                                                                                                                                                                                                                                                                                                                                                                                                                                                                                                                                                                                                                                                                                                                                                                                                                                                                                                                                         | CO1<br><br>CO2                                                                                                                                                                                                                                                                                                          | 6<br><br>1                                                                                                                                                                                                  |
|                                              | Antiretroviral treatment-related (n=7)      | <i>Uptake of antiretroviral treatment</i><br><i>Discontinuation of antiretroviral treatment</i><br><i>Switching of antiretroviral treatment</i><br><i>Resistance to antiretroviral treatment</i><br><i>Antiretroviral drug levels</i><br><i>Treatment of sexually transmitted infections</i><br><i>Sexually transmitted infections - visiting a clinic</i>                                                                                                                                                                                                                                                                                                                                                                                                                                                                                                                                                                                                                                                                                                                                                                                                                                                                                                                                                                                                                                                                                                                                                                                                                                                                                                                                                                                                                                                                                                                                                      | C2<br>C3<br>C4<br>C5<br>C05<br>C07<br>C08                                                                                                                                                                                                                                                                               | 8<br>8<br>8<br>16<br>2<br>3<br>1                                                                                                                                                                            |
|                                              | Treatment-continuation-related (n=1)        | <i>Loss to follow-up/withdrawals</i>                                                                                                                                                                                                                                                                                                                                                                                                                                                                                                                                                                                                                                                                                                                                                                                                                                                                                                                                                                                                                                                                                                                                                                                                                                                                                                                                                                                                                                                                                                                                                                                                                                                                                                                                                                                                                                                                            | CO6                                                                                                                                                                                                                                                                                                                     | 3                                                                                                                                                                                                           |

|                                  |                                   |                                                                                                                                                                                                                                                                                                                                                                                                                                                                                                                                                                                  |                                                                                                                                                     |                                                                                             |
|----------------------------------|-----------------------------------|----------------------------------------------------------------------------------------------------------------------------------------------------------------------------------------------------------------------------------------------------------------------------------------------------------------------------------------------------------------------------------------------------------------------------------------------------------------------------------------------------------------------------------------------------------------------------------|-----------------------------------------------------------------------------------------------------------------------------------------------------|---------------------------------------------------------------------------------------------|
| HIV counseling and testing (n=8) | HIV testing-related (n=2)         | <i>Referral to HIV testing</i><br><i>Uptake of HIV testing</i>                                                                                                                                                                                                                                                                                                                                                                                                                                                                                                                   | D01<br>D2                                                                                                                                           | 1<br>8                                                                                      |
|                                  | Counseling-related (n=4)          | <i>HIV test-related counseling (unspecified)</i><br><i>Pre-test counseling</i><br><i>Post-test counseling</i><br><i>Partner counseling</i>                                                                                                                                                                                                                                                                                                                                                                                                                                       | DO7<br>DO2<br>DO3<br>DO4                                                                                                                            | 2<br>2<br>3<br>1                                                                            |
|                                  | HIV status-related (n=2)          | <i>Patient notification of test results</i><br><i>HIV status disclosure</i>                                                                                                                                                                                                                                                                                                                                                                                                                                                                                                      | DO5<br>DO6                                                                                                                                          | 3<br>2                                                                                      |
|                                  | Mental health/sociological (n=17) | <i>Mental health/psychosocial outcomes (unspecified)</i><br><i>Mental health status - confidence</i><br><i>Mental health status - well-being</i><br><i>Mental health status - self-esteem</i><br><i>Mental health status - mood</i><br><i>Mental health status - self-efficacy/empowerment for protective behaviors</i><br><i>Mental illness</i><br><i>Depression/depressive symptoms</i><br><i>Anxiety/stress</i><br><i>Suicide</i>                                                                                                                                             | EO1<br>EO2<br>EO3<br>EO4<br>EO5<br>E2<br>EO6<br>E3<br>E4<br>EO7                                                                                     | 2<br>1<br>3<br>2<br>2<br>6<br>1<br>10<br>6<br>3                                             |
|                                  | Sociological (n=7)                | <i>Family/friends support</i><br><i>Negotiation skills</i><br><i>Dependence/adverse sociological effects</i><br><i>Stigma (unspecified)</i><br><i>HIV-related stigma</i><br><i>Coping strategies for dealing with HIV-related stigma</i><br><i>Tolerance towards persons living with HIV/AIDS</i>                                                                                                                                                                                                                                                                                | EO12<br>EO13<br>EO14<br>EO9<br>EO10<br>EO11<br>EO8                                                                                                  | 3<br>1<br>1<br>6<br>1<br>1<br>1                                                             |
| Clinical/biological (n=160)      | Clinical symptoms (n=10)          | <i>Appetite</i><br><i>Pain</i><br><i>Duration of pain</i><br><i>Nausea</i><br><i>Diarrhea</i><br><i>Duration of diarrhea</i><br><i>Fatigue</i><br><i>Breathlessness/dyspnea</i><br><i>Stiffness</i><br><i>Symptom resolution</i>                                                                                                                                                                                                                                                                                                                                                 | GO2<br>GO3<br>GO4<br>GO5<br>GO6<br>GO7<br>GO9<br>GO10<br>GO11<br>GO15                                                                               | 2<br>5<br>1<br>1<br>5<br>2<br>3<br>2<br>1<br>6                                              |
|                                  | Clinical signs (n=7)              | <i>Clinical lipodystrophy</i><br><i>Heart rate</i><br><i>Dehydration</i><br><i>Oral ulcer healing</i><br><i>Oral ulcer recurrence</i><br><i>Strength</i><br><i>Stamina</i>                                                                                                                                                                                                                                                                                                                                                                                                       | GO25<br>GO41<br>GO8<br>GO13<br>GO14<br>GO34<br>GO36                                                                                                 | 4<br>2<br>1<br>1<br>1<br>2<br>1                                                             |
|                                  | Anthropometric measures (n=19)    | <i>Anthropometric measures (unspecified)</i><br><i>Weight</i><br><i>Height</i><br><i>Body mass index (BMI)</i><br><i>Weight-for-height</i><br><i>Linear growth</i><br><i>Body composition</i><br><i>Lean body mass</i><br><i>Percentage of body fat</i><br><i>Fat free mass</i><br><i>Girth</i><br><i>Body cell mass</i><br><i>Leg subcutaneous fat area</i><br><i>Abdominal visceral adipose tissue</i><br><i>Waist circumference</i><br><i>Hip circumference</i><br><i>Waist-to-hip ratio</i><br><i>Skin fold thickness</i><br><i>Subcutaneous/cross-sectional muscle area</i> | GO16<br>G2<br>GO152<br>GO17<br>GO18<br>GO19<br>GO20<br>GO21<br>GO22<br>GO23<br>GO24<br>GO26<br>GO27<br>GO28<br>GO29<br>GO30<br>GO31<br>GO32<br>GO33 | 2<br>6<br>1<br>4<br>1<br>2<br>2<br>5<br>3<br>1<br>1<br>1<br>1<br>1<br>1<br>1<br>1<br>3<br>2 |

|                                                                                           |                                                       |                                              |        |
|-------------------------------------------------------------------------------------------|-------------------------------------------------------|----------------------------------------------|--------|
| Laboratory measures<br>(n=28)                                                             | Blood/serum measures (sub-category only)              | NA                                           |        |
|                                                                                           | Hematologic indicators                                | G052 1                                       |        |
|                                                                                           | Hemoglobin                                            | G053 2                                       |        |
|                                                                                           | Hematocrit                                            | G054 1                                       |        |
|                                                                                           | Glucose                                               | G055 2                                       |        |
|                                                                                           | Insulin                                               | G0149 1                                      |        |
|                                                                                           | Albumin/Pre-albumin                                   | G056 1                                       |        |
|                                                                                           | Cholesterol                                           | G057 1                                       |        |
|                                                                                           | Total cholesterol                                     | G058 1                                       |        |
|                                                                                           | LDL cholesterol                                       | G0147 1                                      |        |
|                                                                                           | Triglycerides                                         | G059 3                                       |        |
|                                                                                           | White blood cells/CBC/immunologic outcomes            | G060 3                                       |        |
|                                                                                           | T-cell/immune cells                                   | G3 3                                         |        |
|                                                                                           | CD4 count                                             | G4 42                                        |        |
|                                                                                           | HIV-specific CD4 count                                | G061 1                                       |        |
|                                                                                           | CD4 % of total lymphocytes                            | G062 2                                       |        |
|                                                                                           | CD8 count                                             | G063 1                                       |        |
|                                                                                           | HIV-specific CD8 count                                | G064 1                                       |        |
|                                                                                           | CD4:CD8 ratio                                         | G065 1                                       |        |
|                                                                                           | Virologic outcomes                                    | G0144 1                                      |        |
|                                                                                           | Viral load                                            | G5 24                                        |        |
|                                                                                           | HIV RNA                                               | G6 10                                        |        |
|                                                                                           | Virologic success/suppression/undetectable viral load | G7 16                                        |        |
|                                                                                           | Clinical/treatment/virologic failure                  | G0151 6                                      |        |
|                                                                                           | Virologic response to antiretroviral/HAART treatment  | G8 4                                         |        |
|                                                                                           | Cortisol                                              | G069 1                                       |        |
|                                                                                           | Stool measures (sub-category only)                    | NA                                           |        |
|                                                                                           | Stool culture                                         | G0150 1                                      |        |
|                                                                                           | Other laboratory measures (sub-category only)         | NA                                           |        |
|                                                                                           | Bone mineral density                                  | G037 1                                       |        |
|                                                                                           | Oxygen consumption                                    | G040 2                                       |        |
|                                                                                           | Clinical diagnoses<br>(n=51)                          | Cardiovascular diagnoses (sub-category only) | NA     |
|                                                                                           |                                                       | Coronary artery disease (unspecified)        | G042 3 |
| Myocardial infarction                                                                     |                                                       | G043 3                                       |        |
| Angina                                                                                    |                                                       | G045 1                                       |        |
| Cerebrovascular accident/stroke                                                           |                                                       | G046 1                                       |        |
| Infections-related diagnoses (sub-category only)                                          |                                                       | NA                                           |        |
| Sexually transmitted infections - visiting a clinic                                       |                                                       | G074 4                                       |        |
| Acquisition/incidence of sexually transmitted infections                                  |                                                       | G9 16                                        |        |
| Prevalence of sexually transmitted infections                                             |                                                       | G10 8                                        |        |
| HIV infection                                                                             |                                                       | G075 3                                       |        |
| Acquisition/incidence of HIV (seroconversion)                                             |                                                       | G11 26                                       |        |
| Incidence of HIV with viral isolates matched to index patient                             |                                                       | G076 1                                       |        |
| Transmission of HIV                                                                       |                                                       | G12 6                                        |        |
| Prevalence of HIV                                                                         |                                                       | G13 9                                        |        |
| HIV viral shedding                                                                        |                                                       | G078 3                                       |        |
| HSV infection (category only)                                                             |                                                       | NA                                           |        |
| Incidence of HSV                                                                          |                                                       | G079 1                                       |        |
| HSV viral shedding                                                                        |                                                       | G080 1                                       |        |
| Incidence of HPV                                                                          |                                                       | G081 1                                       |        |
| Incidence of influenza                                                                    |                                                       | G082 1                                       |        |
| Incidence of hepatitis B                                                                  |                                                       | G083 2                                       |        |
| Incidence of measles                                                                      |                                                       | G084 1                                       |        |
| Incidence of other vaginal infections (e.g.bacterial vaginosis, trachomonas, candidiasis) |                                                       | G085 3                                       |        |
| Incidence of other bacterial infections                                                   |                                                       | G086 2                                       |        |
| Incidence of opportunistic infections (unspecified)                                       |                                                       | G14 11                                       |        |
| Incidence of toxoplasmosis                                                                |                                                       | G088 2                                       |        |
| Incidence of parasitic infections excluding toxoplasmosis                                 |                                                       | G089 3                                       |        |
| Incidence of pneumocystis carinii pneumonia                                               |                                                       | G090 2                                       |        |
| Incidence of tuberculosis                                                                 |                                                       | G15 5                                        |        |
| Incidence of drug-resistant tuberculosis                                                  |                                                       | G092 1                                       |        |
| Tuberculosis negative-cultures/smears                                                     |                                                       | G093 2                                       |        |
| Incidence of fungal infections excluding pneumocystis carinii pneumonia                   |                                                       | G091 2                                       |        |
| Incidence of disseminated mycobacterium avium complex                                     |                                                       | G094 1                                       |        |
| Cryptococcal meningitis-free cultures                                                     |                                                       | G0146 1                                      |        |
| Pneumonia diagnoses (sub-category only)                                                   |                                                       | NA                                           |        |
| Pneumococcal pneumonia                                                                    |                                                       | G0120 1                                      |        |
| Pneumocystis jiroveci pneumonia                                                           |                                                       | G0121 1                                      |        |
| Toxoplasma pneumonia                                                                      |                                                       | G0122 1                                      |        |
| Invasive cryptococcal disease (pneumonia/meningitis)                                      |                                                       | G0123 1                                      |        |
| Cancer/malignancy diagnoses (sub-category only)                                           |                                                       | NA                                           |        |
| Opportunistic cancers/malignancies                                                        |                                                       | G095 4                                       |        |
| Cervical intraepithelial neoplasia (CIN)                                                  |                                                       | G096 1                                       |        |
| Primary liver cell carcinomas                                                             |                                                       | G0126 1                                      |        |
| Tumor response                                                                            |                                                       | G0129 5                                      |        |
| Tumor recurrence                                                                          |                                                       | G0130 1                                      |        |
| Hepato-biliary diagnoses (sub-category only)                                              |                                                       | NA                                           |        |
| Liver/hepatic failure                                                                     |                                                       | G0125 1                                      |        |
| Liver cirrhosis                                                                           |                                                       | G0124 1                                      |        |
| Neurologic disease (sub-unspecified)                                                      |                                                       | G0127 3                                      |        |
| Post-herpetic neuralgia                                                                   |                                                       | G0128 1                                      |        |
| Bone-related diagnoses (sub-category only)                                                |                                                       | NA                                           |        |
| Fractures                                                                                 |                                                       | G012 1                                       |        |
| Osteoporosis                                                                              |                                                       | G038 1                                       |        |
| Osteopenia                                                                                |                                                       | G039 1                                       |        |
| AIDS-related diagnoses (sub-category only)                                                |                                                       | NA                                           |        |
| Progression to AIDS                                                                       |                                                       | G22 20                                       |        |
| AIDS-defining illness/event                                                               |                                                       | G23 16                                       |        |
| Other clinical diagnoses (sub-category only)                                              |                                                       | NA                                           |        |
| Acute retroviral syndrome                                                                 |                                                       | G049 1                                       |        |
| Immune Reconstitution Inflammatory Syndrome (IRIS)                                        |                                                       | G050 2                                       |        |

|                                                       |                                                                               |       |    |
|-------------------------------------------------------|-------------------------------------------------------------------------------|-------|----|
| Pregnancy, postpartum, and neonatal (n=15)            | Pregnancy-related outcomes (sub-category only)                                | NA    |    |
|                                                       | <i>Pregnancy</i>                                                              | GO97  | 8  |
|                                                       | <i>Pregnancy outcomes</i>                                                     | GO99  | 1  |
|                                                       | <i>Information on prevention of mother to child transmission (PMTCT)</i>      | GO100 | 1  |
|                                                       | <i>Safe delivery, either at home or hospital</i>                              | GO101 | 1  |
|                                                       | <i>Hospital deliveries among women living with HIV</i>                        | GO102 | 1  |
|                                                       | <i>Premature deliveries</i>                                                   | GO103 | 5  |
|                                                       | <i>Stillbirth</i>                                                             | GO104 | 4  |
|                                                       | Postpartum and neonatal outcomes (sub-category only)                          | NA    |    |
|                                                       | Measures of postpartum morbidity                                              | G16   | 4  |
|                                                       | Measures of neonatal/infant/child morbidity                                   | G19   | 3  |
|                                                       | <i>Low birth weight</i>                                                       | GO105 | 4  |
|                                                       | <i>Infant feeding counseling</i>                                              | GO107 | 1  |
|                                                       | <i>Mother-to-child transmission of HIV, including HIV status in offspring</i> | G18   | 12 |
| <i>Infant received HIV test</i>                       | GO111                                                                         | 1     |    |
| <i>Neonatal sepsis</i>                                | GO112                                                                         | 1     |    |
| <i>Neonatal intensive care unit (NICU) admissions</i> | GO113                                                                         | 2     |    |
| Survival-related (n=4)                                | <i>Survival/overall survival</i>                                              | G24   | 8  |
|                                                       | <i>Infant/child survival</i>                                                  | GO154 | 1  |
|                                                       | <i>HIV-free survival</i>                                                      | GO131 | 2  |
|                                                       | <i>Cancer-free survival</i>                                                   | GO132 | 4  |
| Death-related (n=13)                                  | <i>Death/mortality/all-cause mortality</i>                                    | G25   | 68 |
|                                                       | <i>Neonatal/infant mortality</i>                                              | G17   | 5  |
|                                                       | <i>HIV/AIDS-related mortality</i>                                             | GO133 | 13 |
|                                                       | <i>HPV-related mortality</i>                                                  | GO134 | 1  |
|                                                       | <i>Influenza-related mortality</i>                                            | GO135 | 1  |
|                                                       | <i>Hepatitis B-related mortality</i>                                          | GO136 | 1  |
|                                                       | <i>Pneumococcal-related mortality</i>                                         | GO137 | 1  |
|                                                       | <i>Pneumocystis jiroveci-related mortality</i>                                | GO138 | 1  |
|                                                       | <i>Toxoplasma pneumonia-related mortality</i>                                 | GO139 | 1  |
|                                                       | <i>Toxoplasma encephalitis-related mortality</i>                              | GO140 | 1  |
|                                                       | <i>Tuberculosis-related mortality</i>                                         | GO141 | 1  |
|                                                       | <i>Kaposi sarcoma-related mortality</i>                                       | GO142 | 1  |
|                                                       | <i>Diarrhea-related mortality</i>                                             | GO143 | 1  |
| Other clinical/biological outcome domains (n=13)      | <i>Dietary intake</i>                                                         | GO1   | 1  |
|                                                       | <i>Blood transfusion</i>                                                      | GO70  | 2  |
|                                                       | <i>Packed red cell transfusion</i>                                            | GO71  | 1  |
|                                                       | <i>Hospitalization</i>                                                        | G20   | 12 |
|                                                       | <i>Duration of hospitalization</i>                                            | GO114 | 3  |
|                                                       | <i>Functional status/disability</i>                                           | GO115 | 4  |
|                                                       | <i>Activities of daily living</i>                                             | GO153 | 1  |
|                                                       | <i>Cognitive function</i>                                                     | GO116 | 2  |
|                                                       | <i>Disease progression (unspecified)</i>                                      | G21   | 5  |
|                                                       | <i>Vaccine failure</i>                                                        | GO145 | 1  |
|                                                       | <i>Duration of skin lesions</i>                                               | GO148 | 2  |
|                                                       | <i>Respiratory/lung function</i>                                              | GO117 | 5  |
|                                                       | <i>Need for mechanical ventilation</i>                                        | GO118 | 1  |



|                                                 |                                             |                                                                       |      |    |
|-------------------------------------------------|---------------------------------------------|-----------------------------------------------------------------------|------|----|
| Health services access and uptake-related (n=9) | Health services access-related (n=4)        | Access to/coverage of services                                        | F2   | 3  |
|                                                 |                                             | Access to/coverage of services for disadvantaged patients/populations | FO1  | 1  |
|                                                 |                                             | Barriers to services                                                  | FO2  | 2  |
|                                                 |                                             | Ease and timeliness of access to services                             | FO5  | 3  |
| Health services uptake-related (n=3)            | Health services uptake-related (n=3)        | Utilization of healthcare                                             | F3   | 5  |
|                                                 |                                             | Quality of healthcare                                                 | F4   | 3  |
|                                                 |                                             | Impact of male participation on health services                       | FO6  | 1  |
| Other health services outcome domains           | Other health services outcome domains       | Retention in overall care                                             | F5   | 3  |
|                                                 |                                             | Referral to other services                                            | FO3  | 2  |
| Knowledge-related (n=8)                         | Knowledge-related (n=8)                     | Knowledge (unspecified)                                               | HO1  | 3  |
|                                                 |                                             | Sexually transmitted infections-related knowledge                     | HO2  | 3  |
|                                                 |                                             | Knowledge of providers regarding sexually transmitted infections      | HO3  | 1  |
|                                                 |                                             | HIV-related knowledge                                                 | H2   | 8  |
|                                                 |                                             | Risk behavior/prevention-related knowledge                            | HO4  | 1  |
|                                                 |                                             | Sexual risk behavior-related knowledge                                | HO5  | 1  |
|                                                 |                                             | Condom use-related knowledge                                          | HO6  | 1  |
|                                                 |                                             | HIV status knowledge                                                  | HO7  | 1  |
| Attitudes-related (n=5)                         | Attitudes-related (n=5)                     | Attitudes (unspecified)                                               | IO1  | 2  |
|                                                 |                                             | Risk behavior/prevention-related attitudes                            | IO2  | 2  |
|                                                 |                                             | Condom use-related attitudes                                          | IO3  | 1  |
|                                                 |                                             | Sexual risk behavior-related attitudes                                | IO4  | 1  |
|                                                 |                                             | Provider attitudes                                                    | IO5  | 1  |
| Adherence-related (n=1)                         | Adherence-related (n=1)                     | Adherence                                                             | J2   | 26 |
| Quality-of-life-related (n=1)                   | Quality-of-life-related (n=1)               | Quality-of-life                                                       | K2   | 39 |
| Economic (n=3)                                  | Economic (n=3)                              | Cost/cost-effectiveness for patients                                  | L2   | 20 |
|                                                 |                                             | Cost/cost-effectiveness for providers                                 | LO1  | 3  |
|                                                 |                                             | Economic empowerment/improvement in economic well-being for patients  | LO2  | 1  |
| Preference/satisfaction (n=5)                   | Patient or partner preference-related (n=3) | Patient preferences                                                   | MO1  | 3  |
|                                                 |                                             | Patient satisfaction with intervention                                | M2   | 4  |
|                                                 |                                             | Patient intervention acceptability                                    | M3   | 10 |
|                                                 | Provider preference-related (n=2)           | Provider preferences                                                  | MO3  | 1  |
| Provider satisfaction                           | MO4                                         | 2                                                                     |      |    |
| Adverse effects-related (n=5)                   | Adverse effects-related (n=5)               | Adverse events/complications (unspecified)                            | A2   | 50 |
|                                                 |                                             | Adverse events/complications (specified)                              | A3   | 17 |
|                                                 |                                             | Major/severe/serious adverse events                                   | A4   | 25 |
|                                                 |                                             | Allergic reactions to latex                                           | AO3  | 1  |
|                                                 |                                             | Harm for false positives                                              | AO4  | 1  |
| Other outcomes (n=11)                           | Other outcome domains (n=11)                | Socioeconomic status                                                  | O2   | 1  |
|                                                 |                                             | Employment/employment loss                                            | OO3  | 1  |
|                                                 |                                             | School attendance                                                     | OO4  | 1  |
|                                                 |                                             | Illness intrusiveness                                                 | OO6  | 2  |
|                                                 |                                             | Violence - physical/psychological/sexual                              | OO7  | 1  |
|                                                 |                                             | Domestic violence/intimate partner violence                           | OO8  | 2  |
|                                                 |                                             | Marital conflict                                                      | OO9  | 1  |
|                                                 |                                             | Breach of confidentiality                                             | OO10 | 2  |
|                                                 |                                             | Misinterpretation of information                                      | OO11 | 3  |
|                                                 |                                             | Diagnostic accuracy                                                   | OO15 | 1  |
|                                                 |                                             | Education                                                             | OO17 | 1  |
